# Supplementary material for: METTL3-mediated m6A methylation of C1qA regulates the Rituximab resistance of diffuse large B-cell lymphoma cells
Source: PubMed Central journal article supplement (PMC10618261; doi:10.1038/s41420-023-01698-2), 2023-11-01

Figure 1

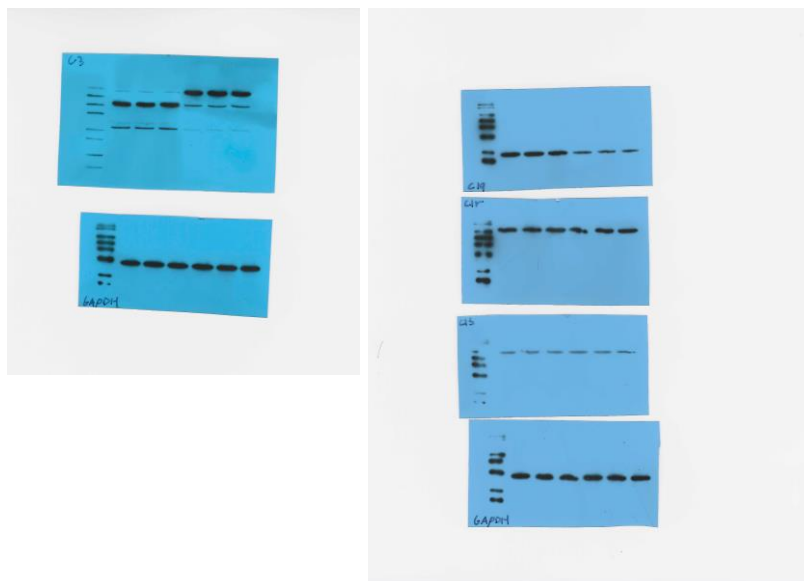

Figure 2

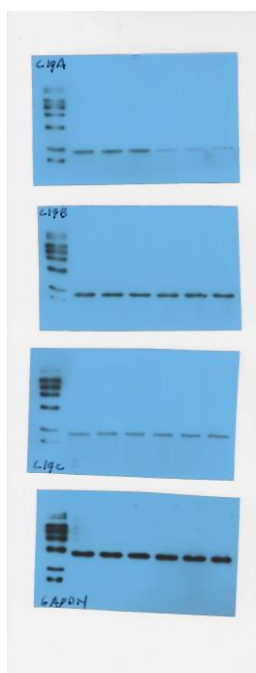

Figure 3

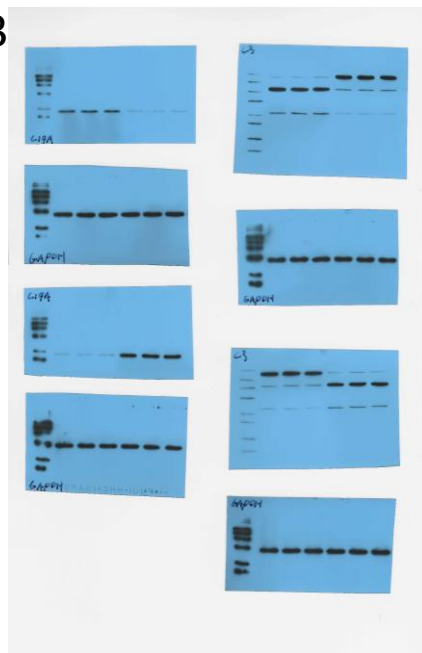

Figure 4

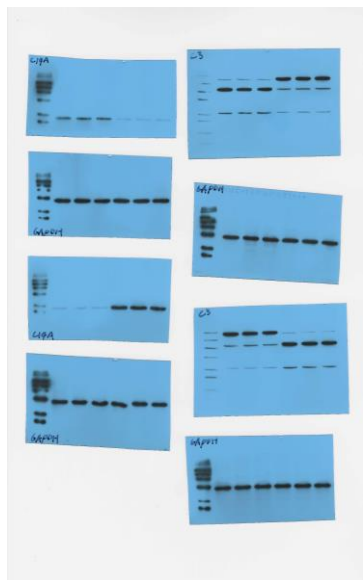

Figure 5

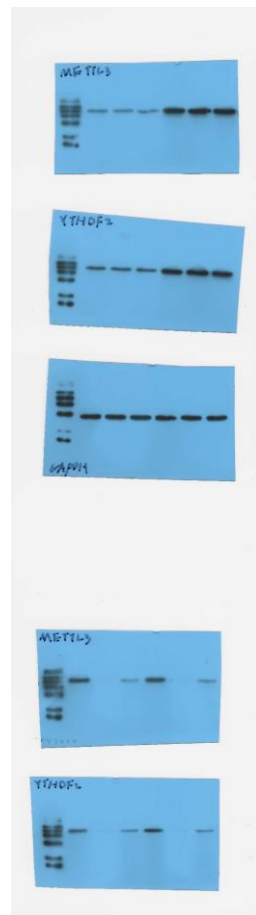

Figure 6

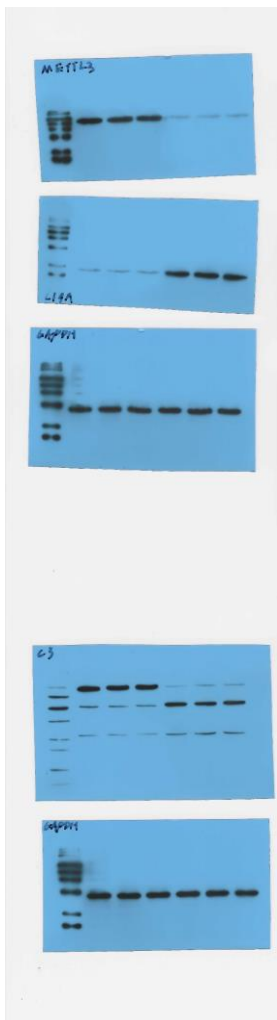

Figure 7

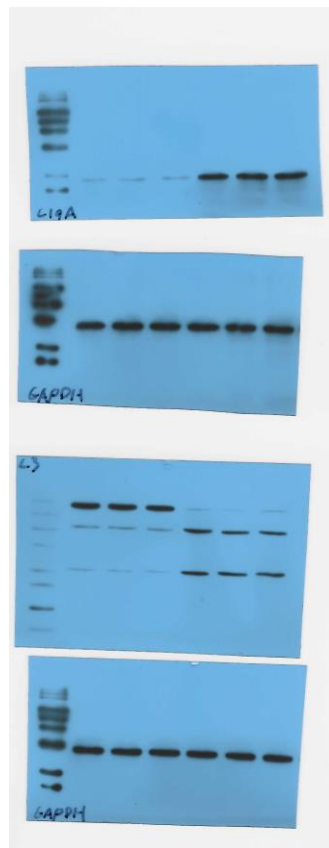

Figure 8

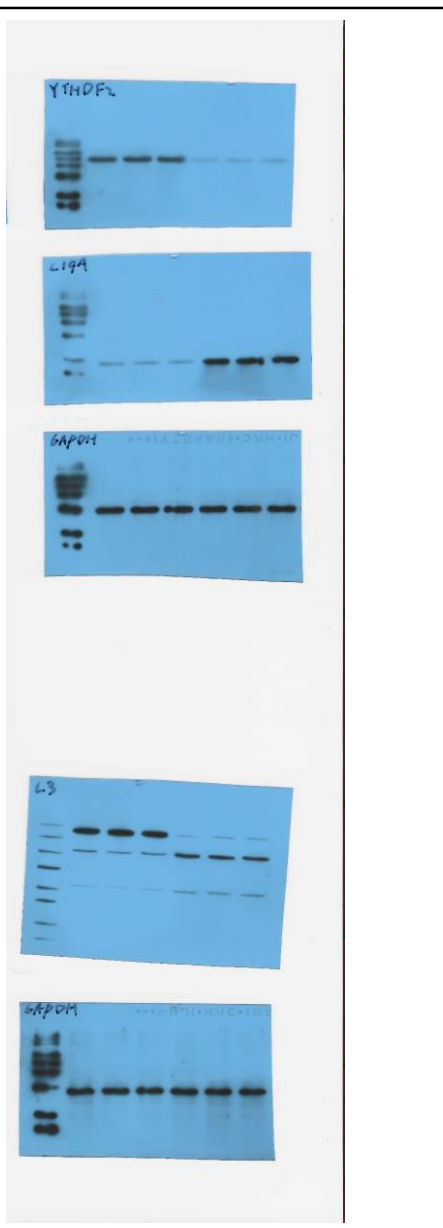

Supplement: 41420_2023_1698_MOESM3_ESM.pdf [file 41420_2023_1698_MOESM3_ESM.pdf]
